# Supplementary material
Source: Springer Nature journal article supplement (https://www.springermedizin.de/resource/supplementary/13019_2012_778_MOESM11_ESM.pdf/9639066)

**Figure 6 (a-d)**

**6a- Externally supported graft**

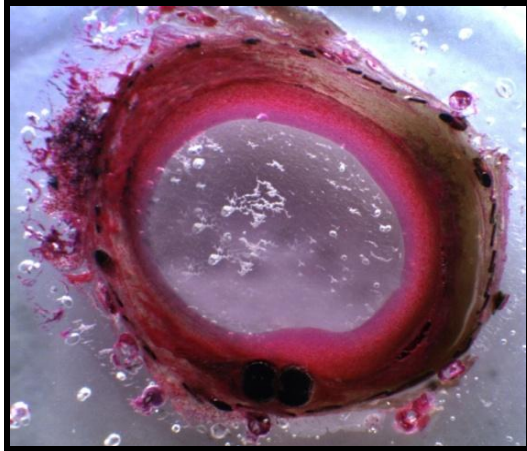

**6b - control graft**

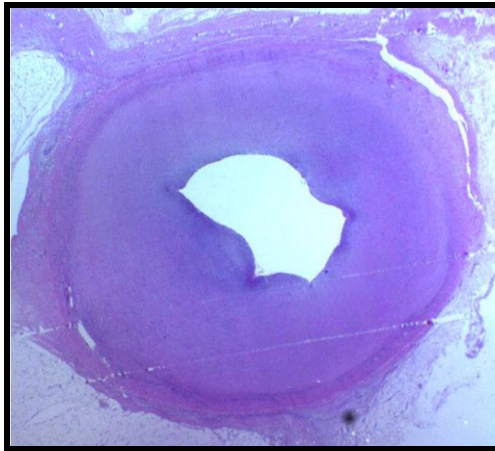

**6c - Externally supported graft**

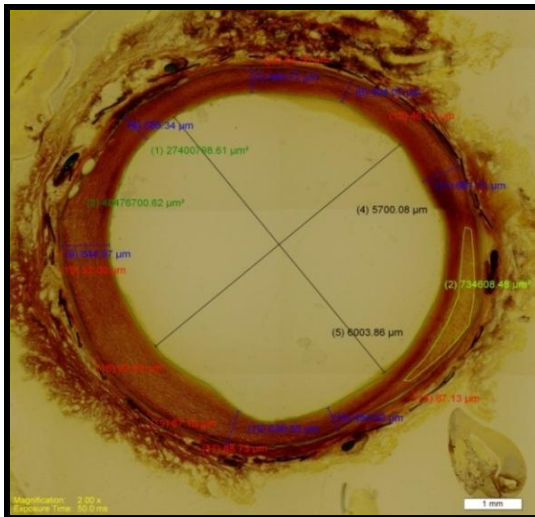

**6d - control graft**

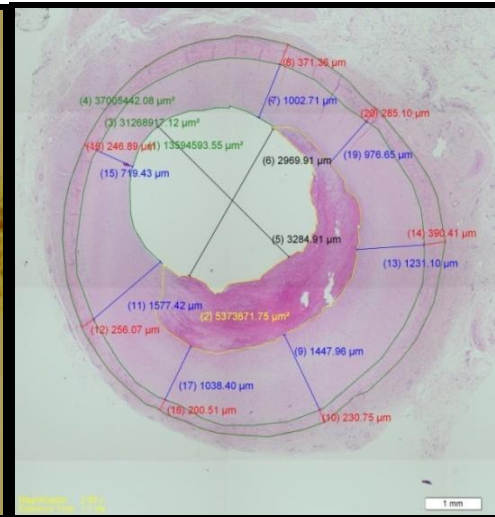

Supplement: MOESM11 [file 9639066]
